# Supplementary material for: Anomalous Wear Behavior of UHMWPE During Sliding Against CoCrMo Under Varying Cross-Shear and Contact Pressure
Source: Springer Nature journal article supplement (doi:10.1007/s11249-022-01660-w), 2022-10-21

Supplementary Material: 2D profiles of a selection of pins on the same x and y scale.

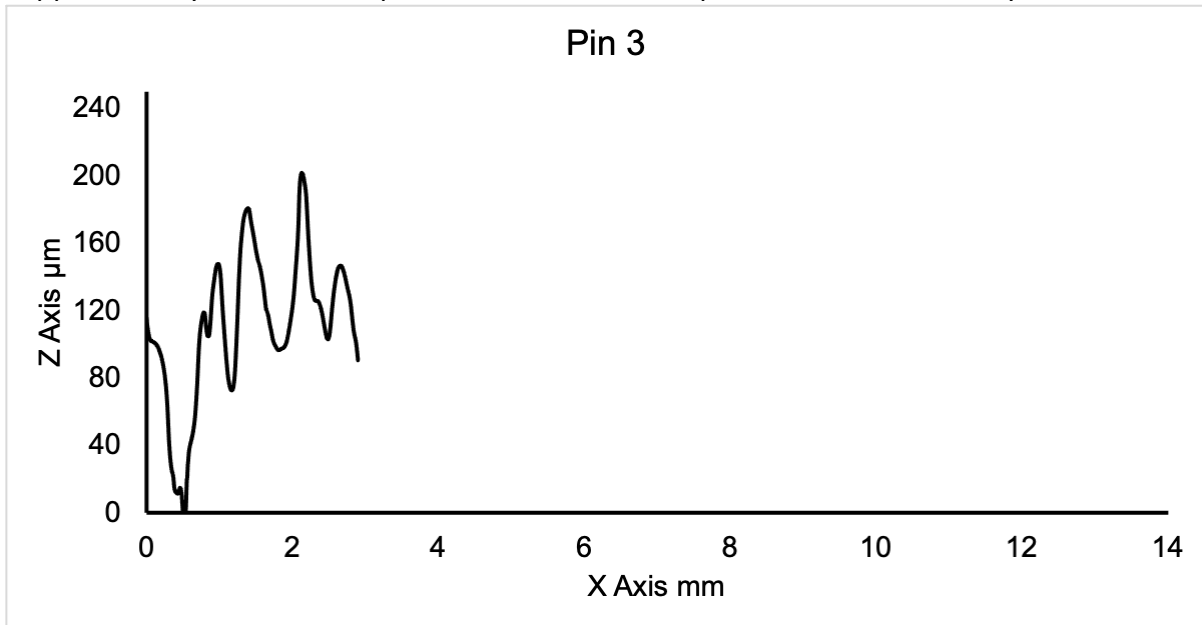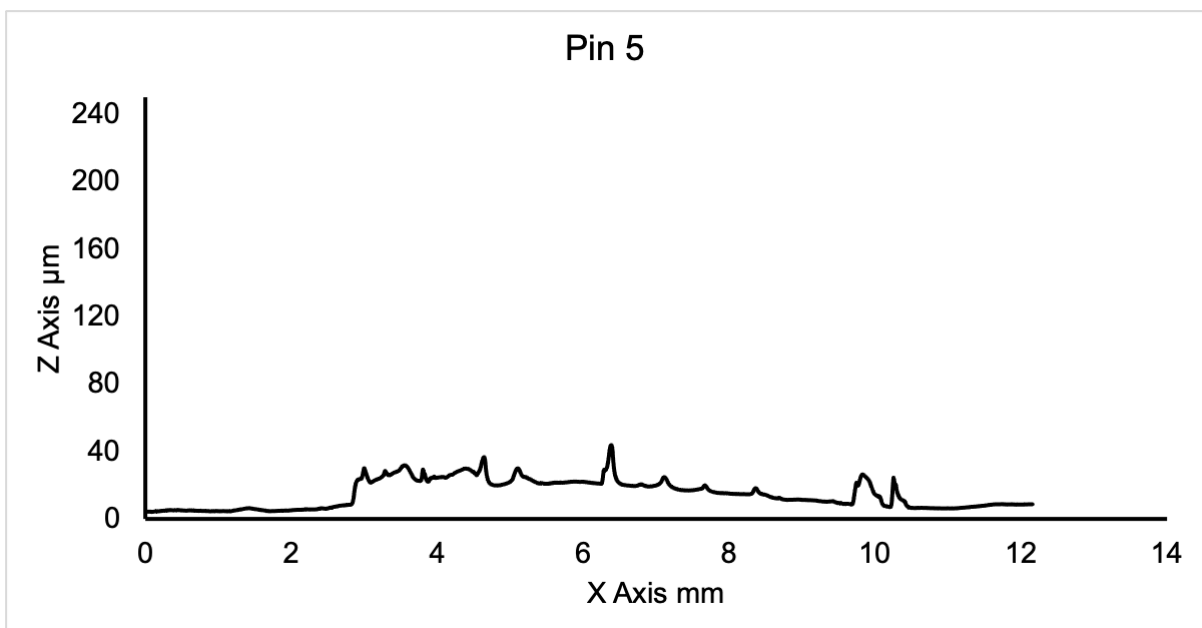

Pin 19

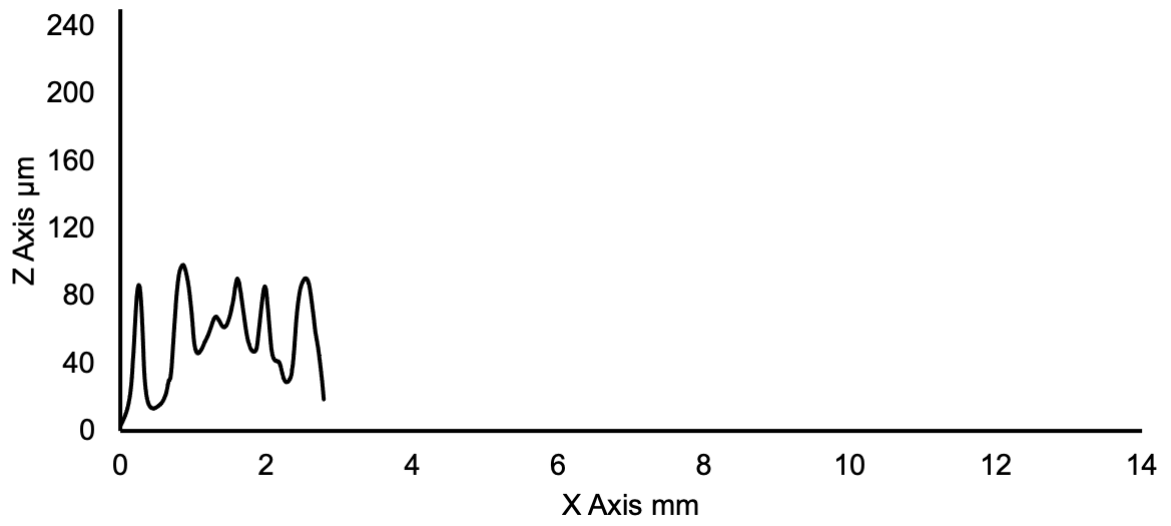

Pin 23

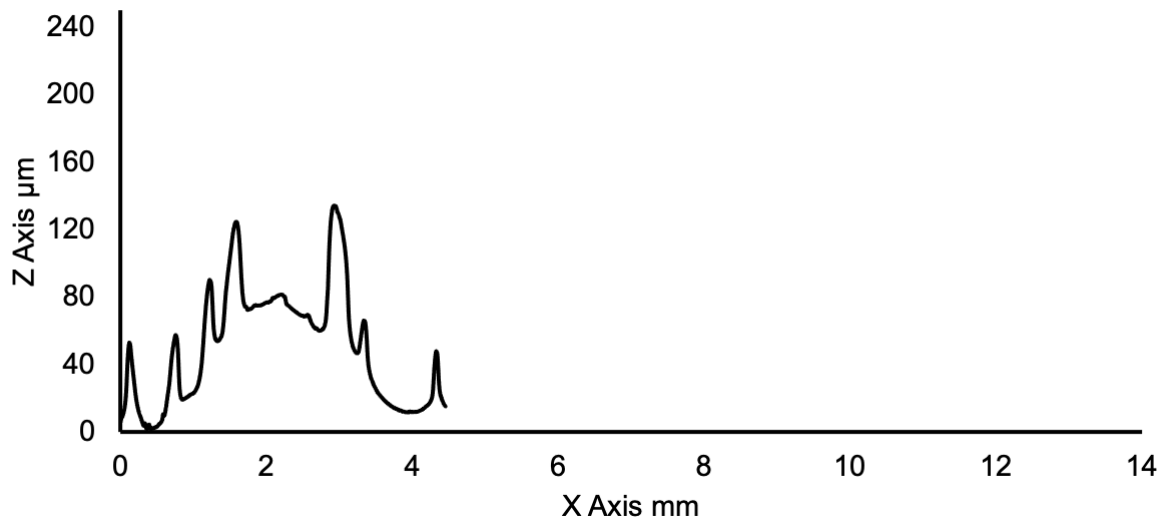

Pin 26

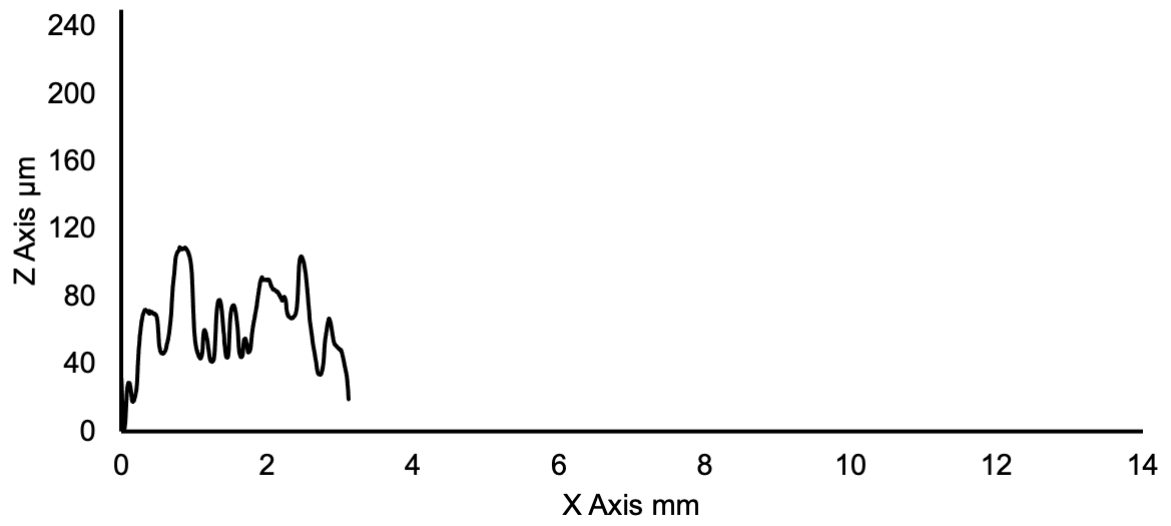

Pin 30

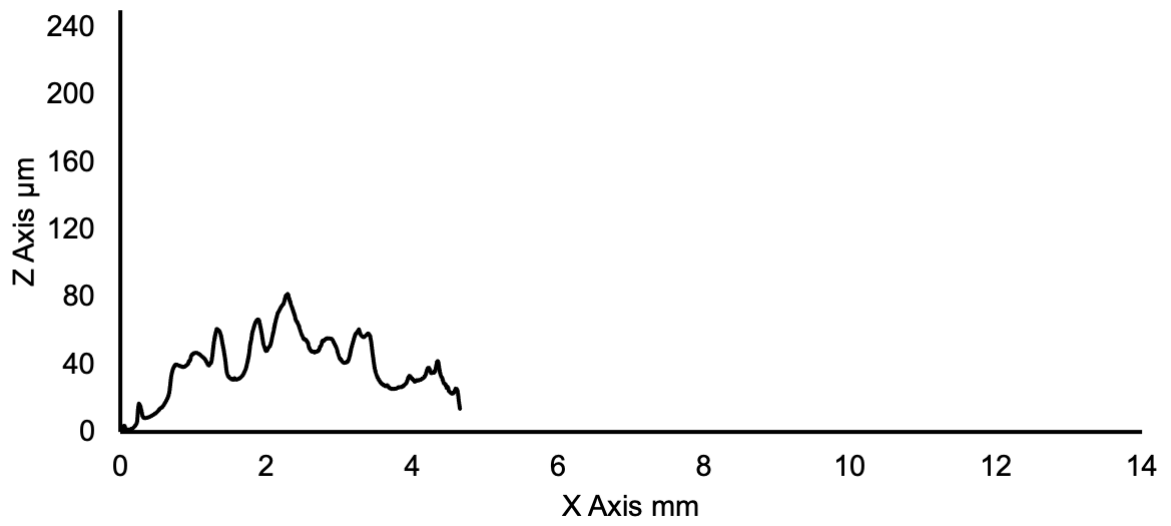

Pin 33

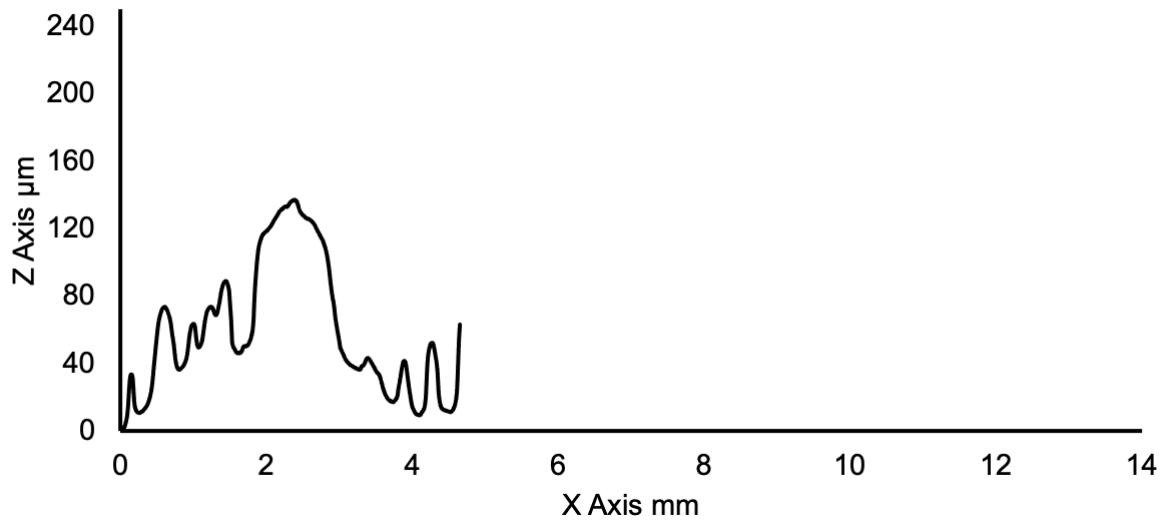

Pin 39

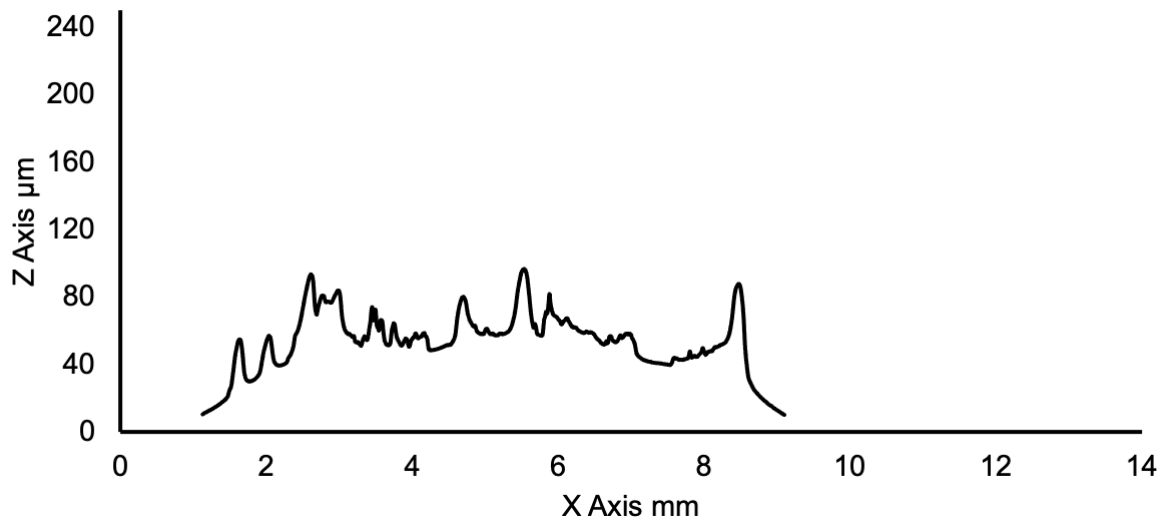

Pin 46

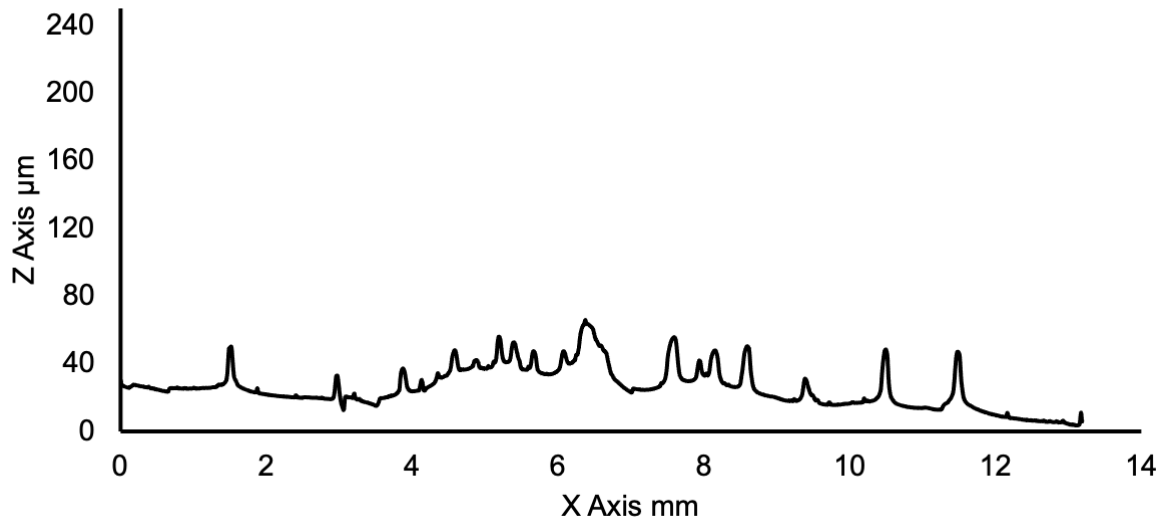

Supplement: MOESM1 [file 23630832]
